# Supplementary material
Source: MDPI journal article supplement (https://www.mdpi.com/2076-0787/7/3/84)
Supplement: s1 [file s1]

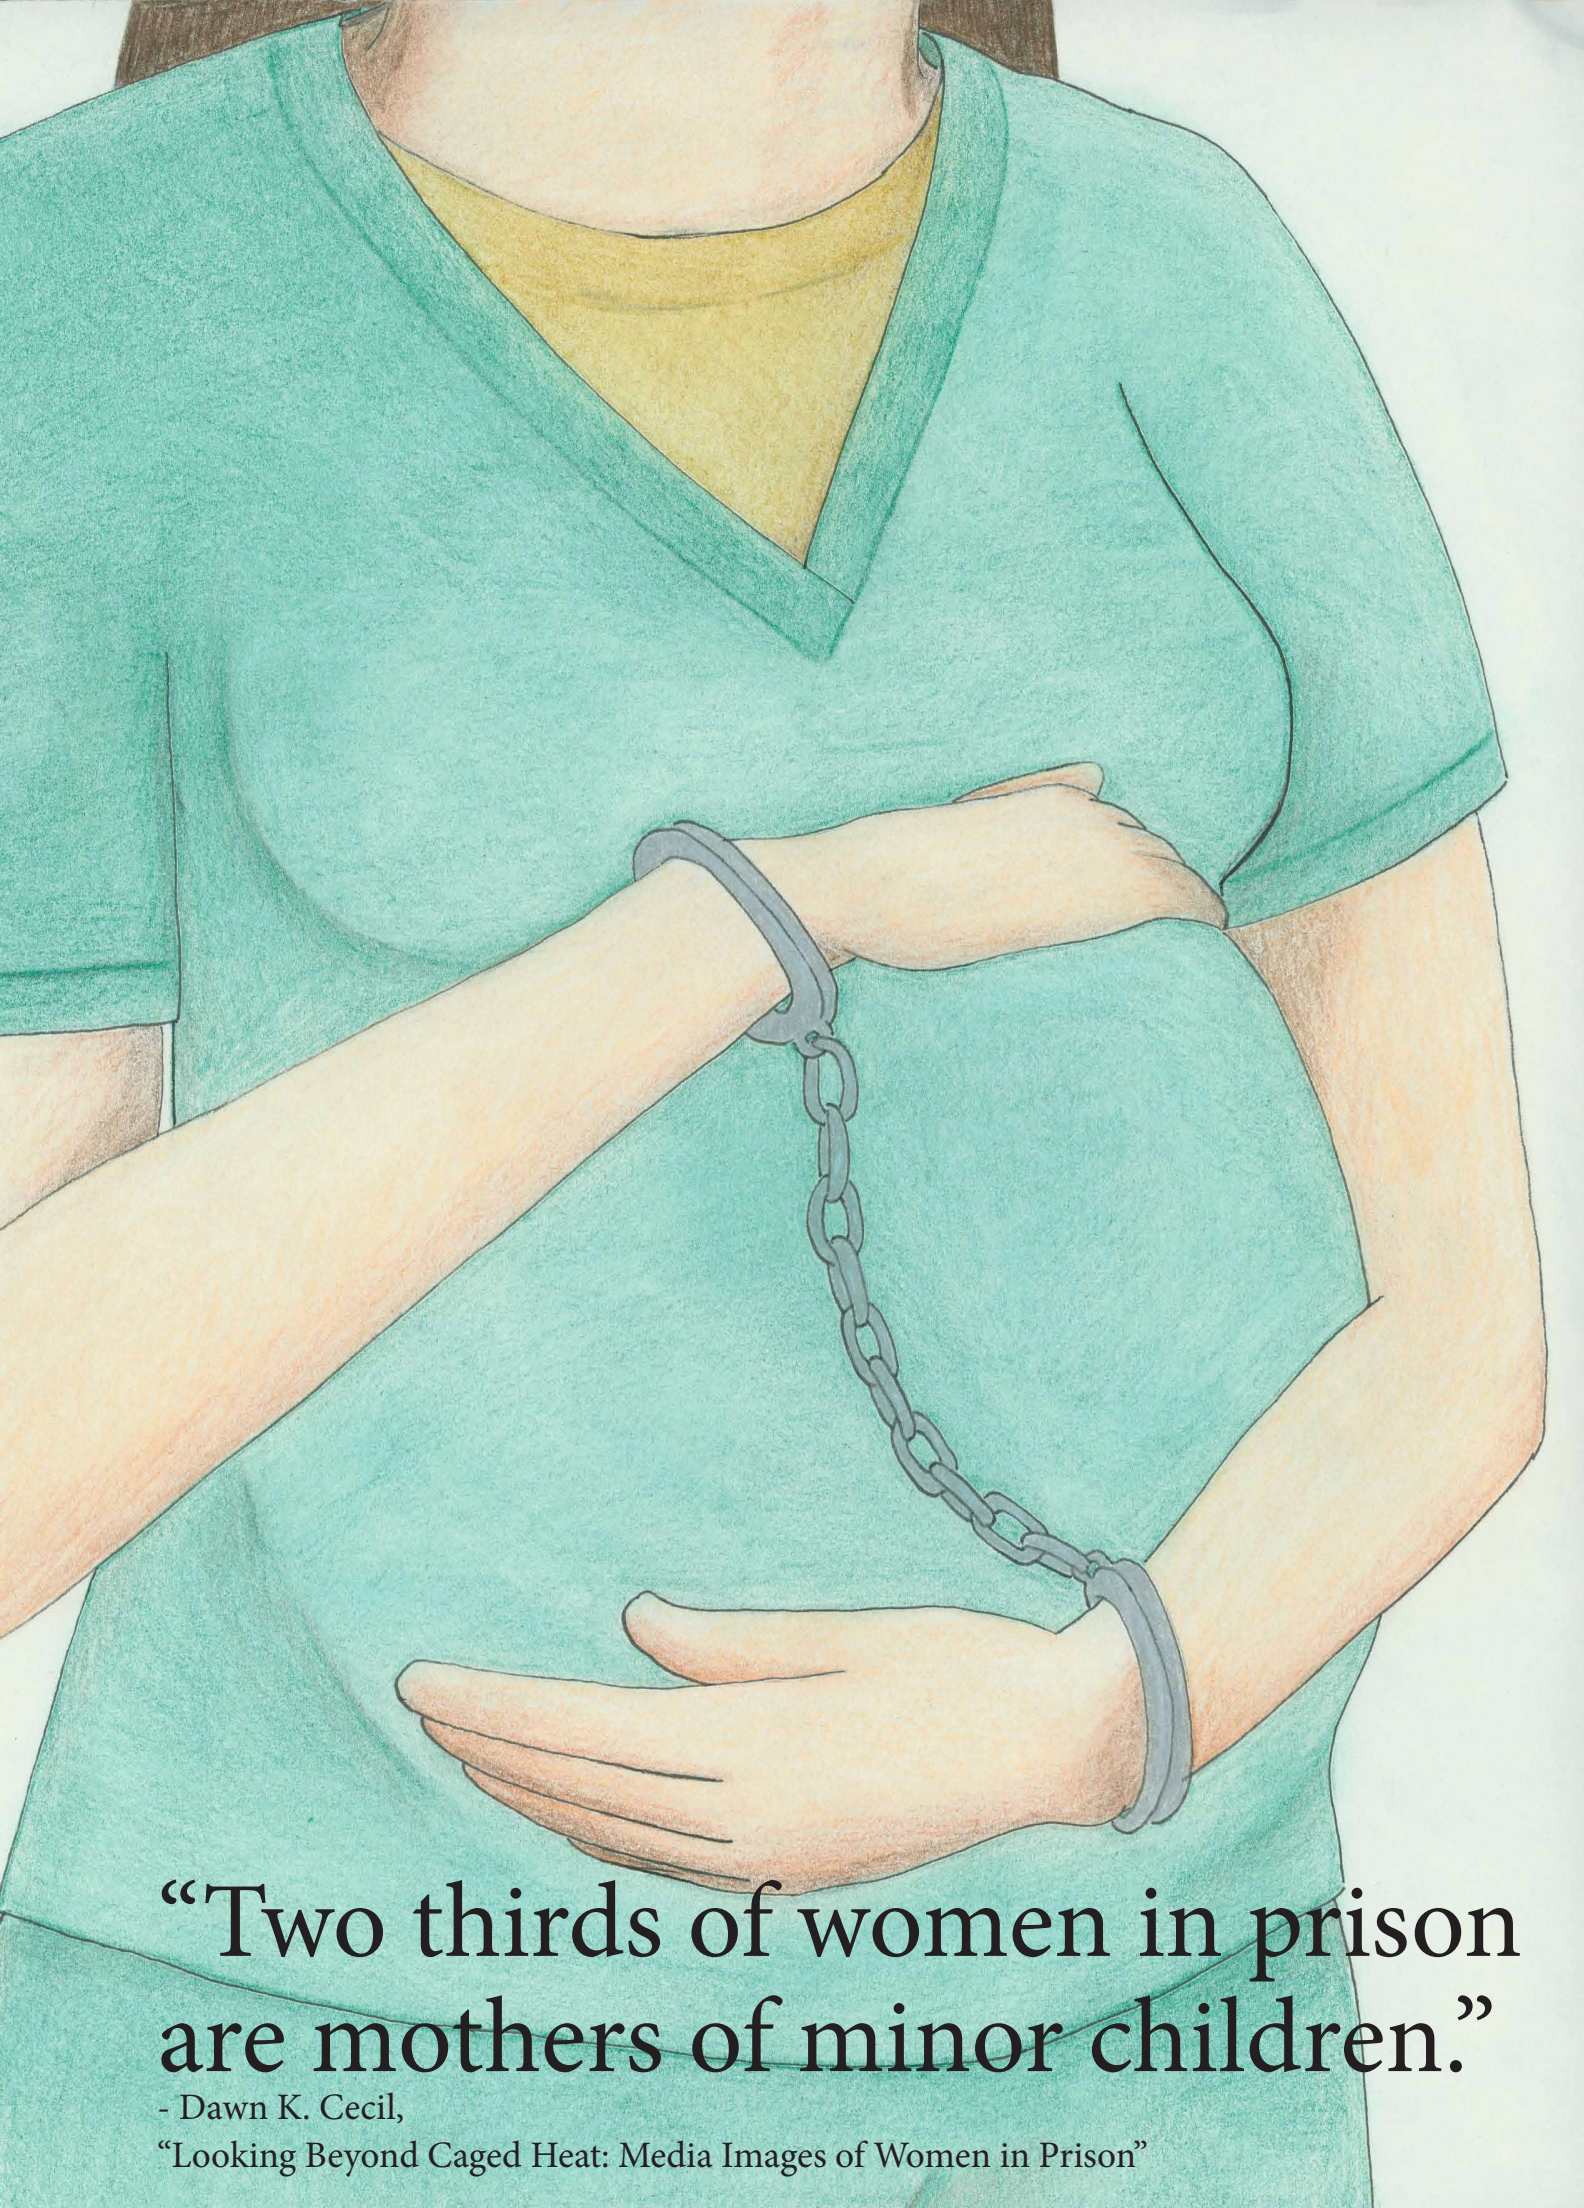

“Two thirds of women in prison are mothers of minor children.”

- Dawn K. Cecil, "Looking Beyond Caged Heat: Media Images of Women in Prison"

girl scouts

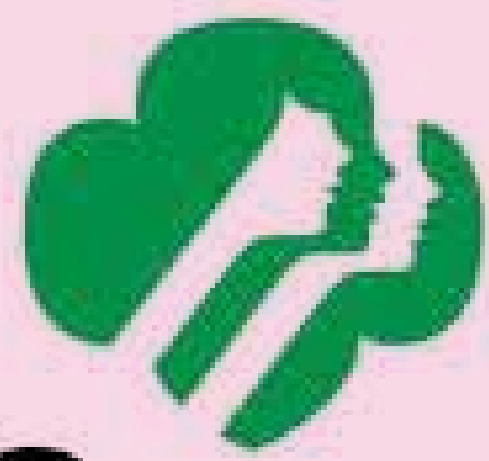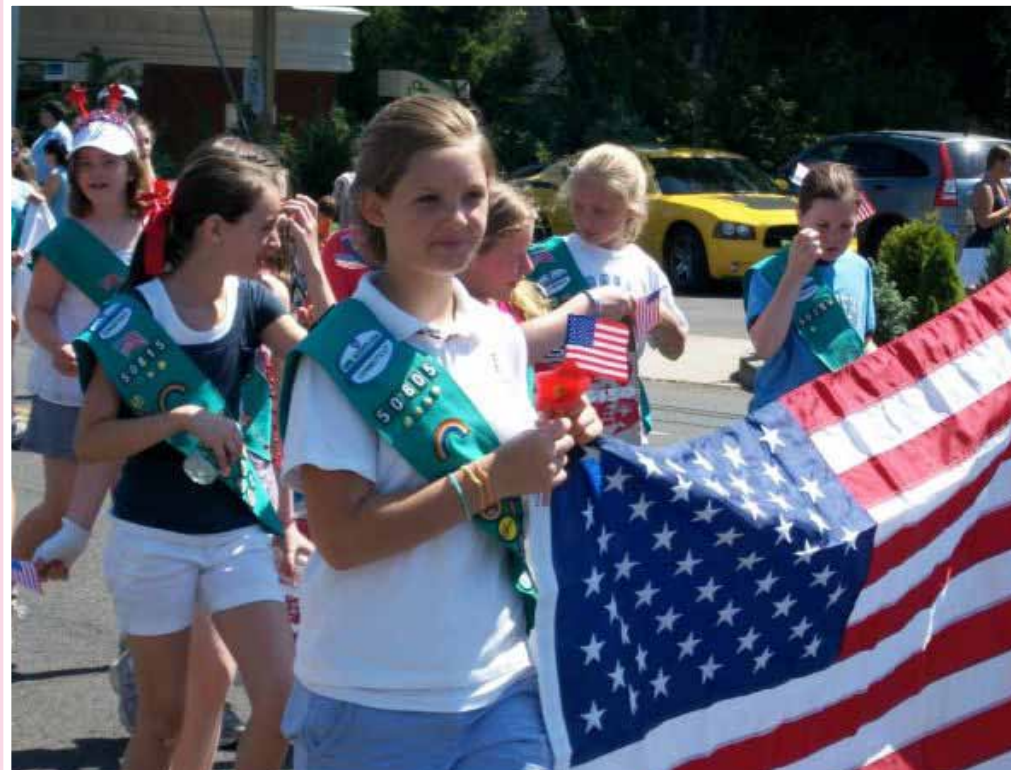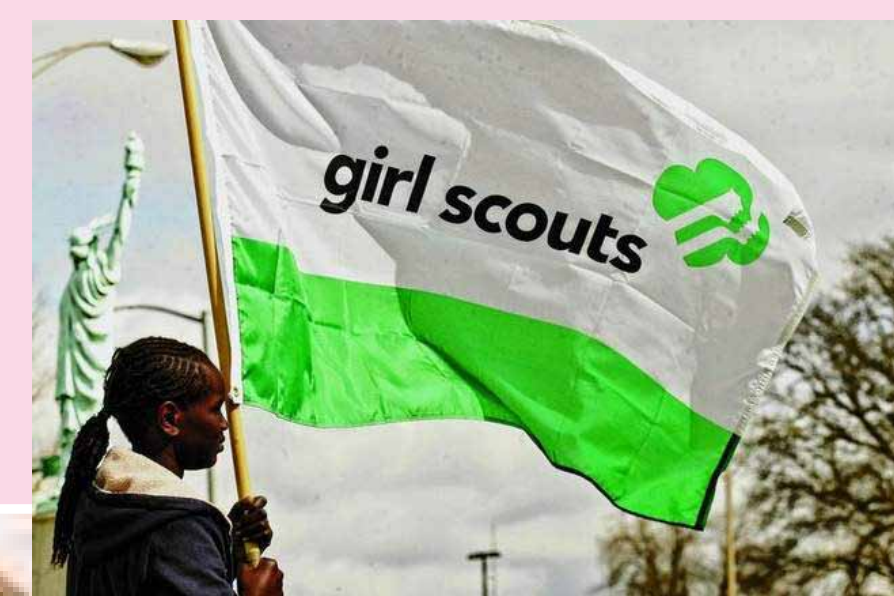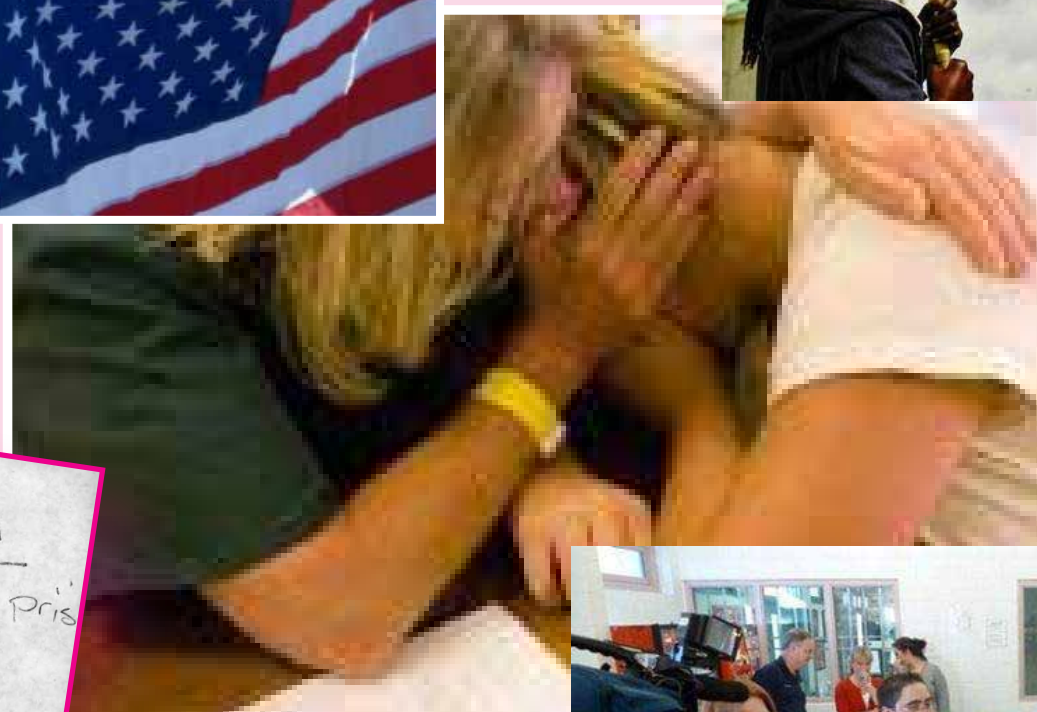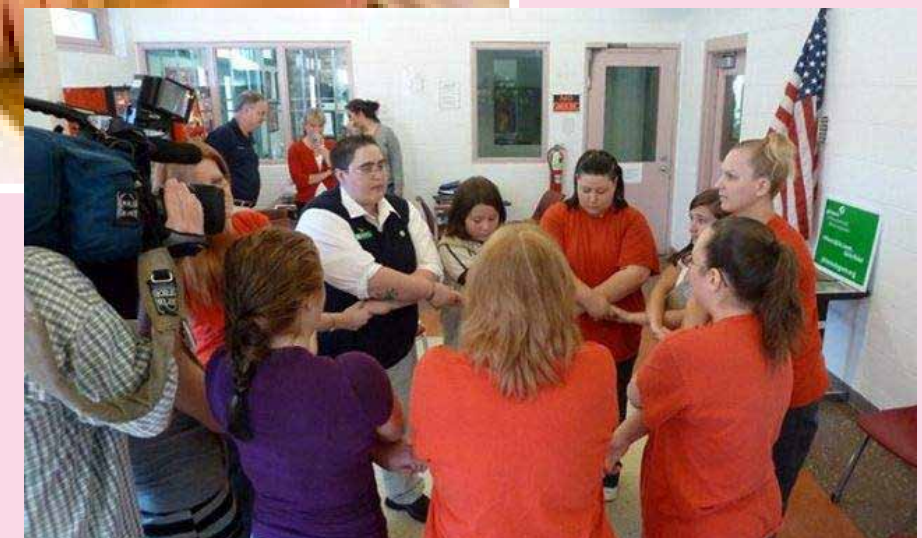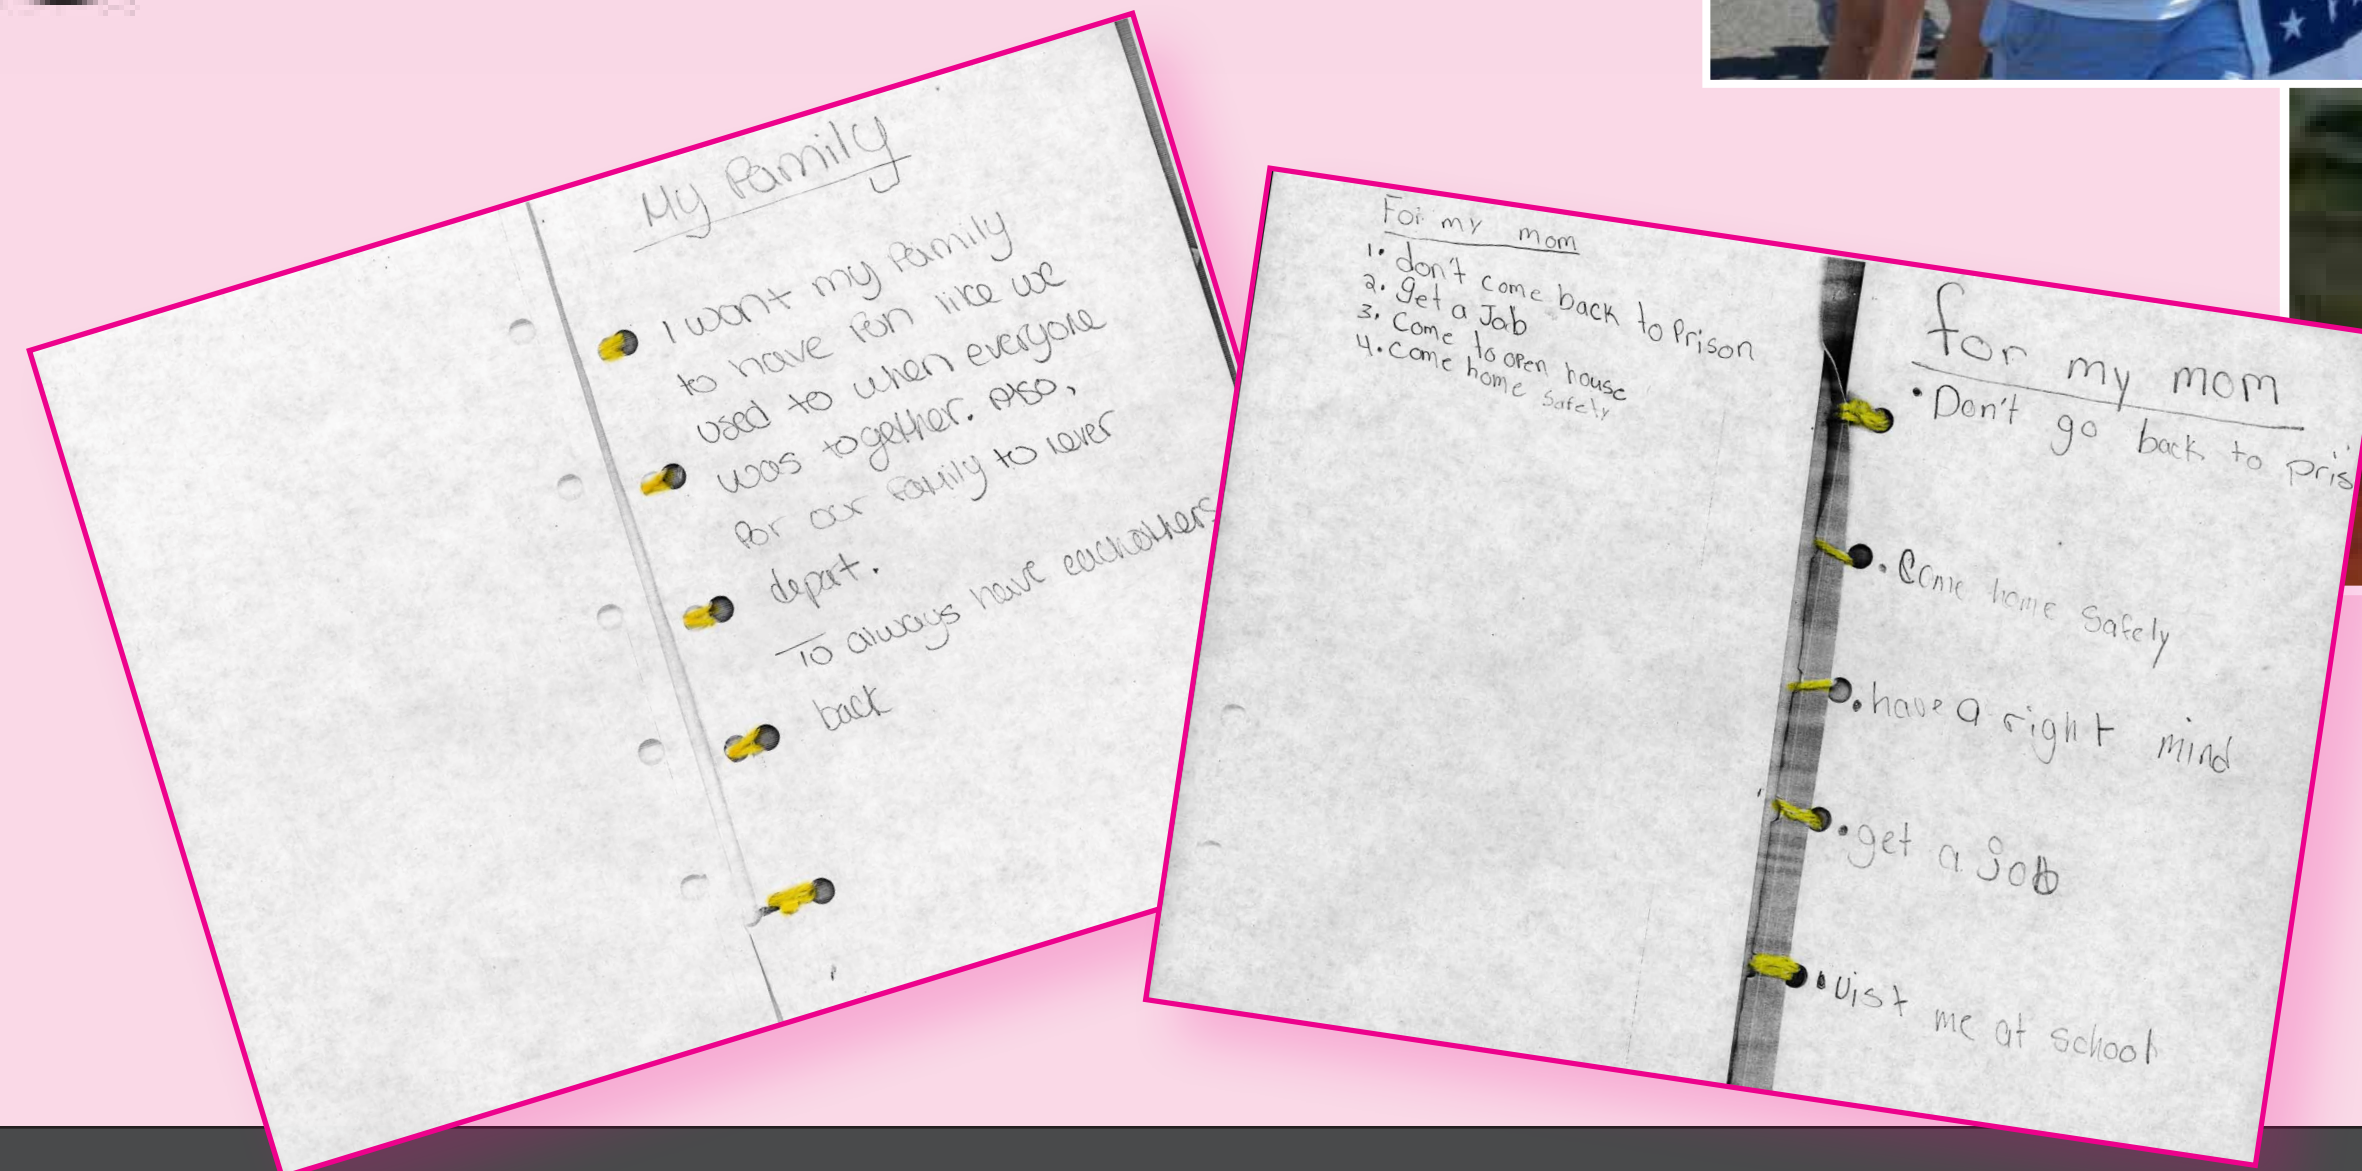

“...he was the door through which I walked toward repair.”

Kathy Boudin, “Alive Behind the Labels: Women in Prison”

# Dear Mama

by Melissa, Jess, Enna, and Ash

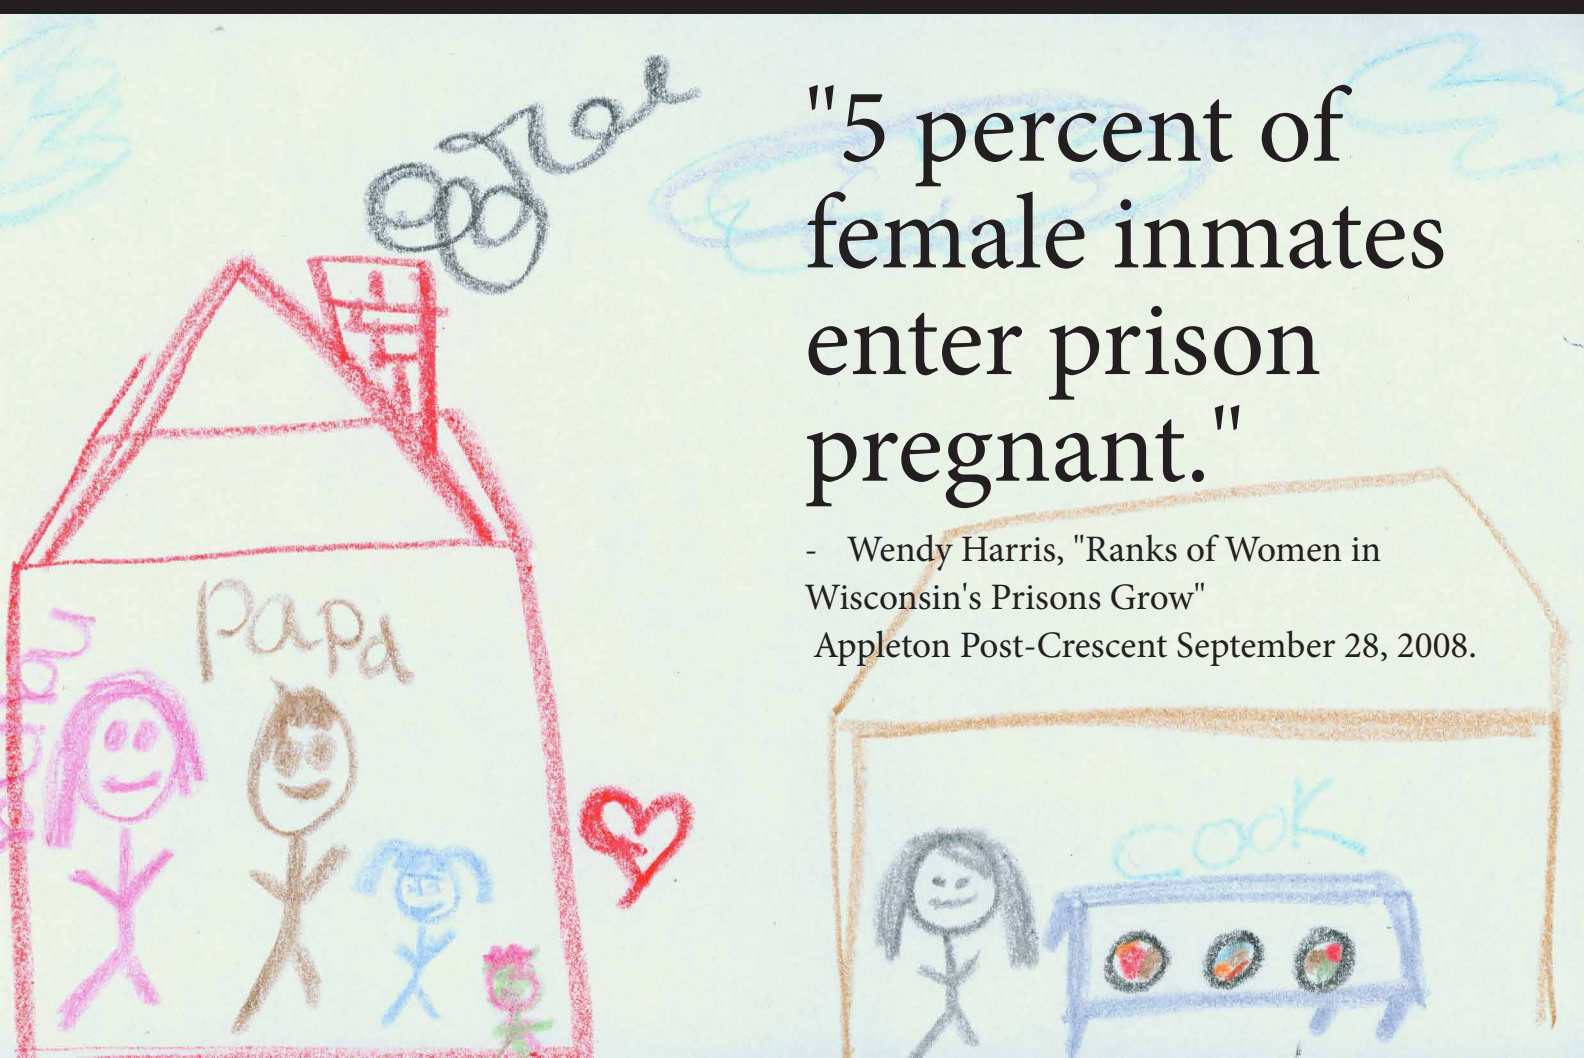

"5 percent of female inmates enter prison pregnant."

- Wendy Harris, "Ranks of Women in Wisconsin's Prisons Grow" Appleton Post-Crescent September 28, 2008.

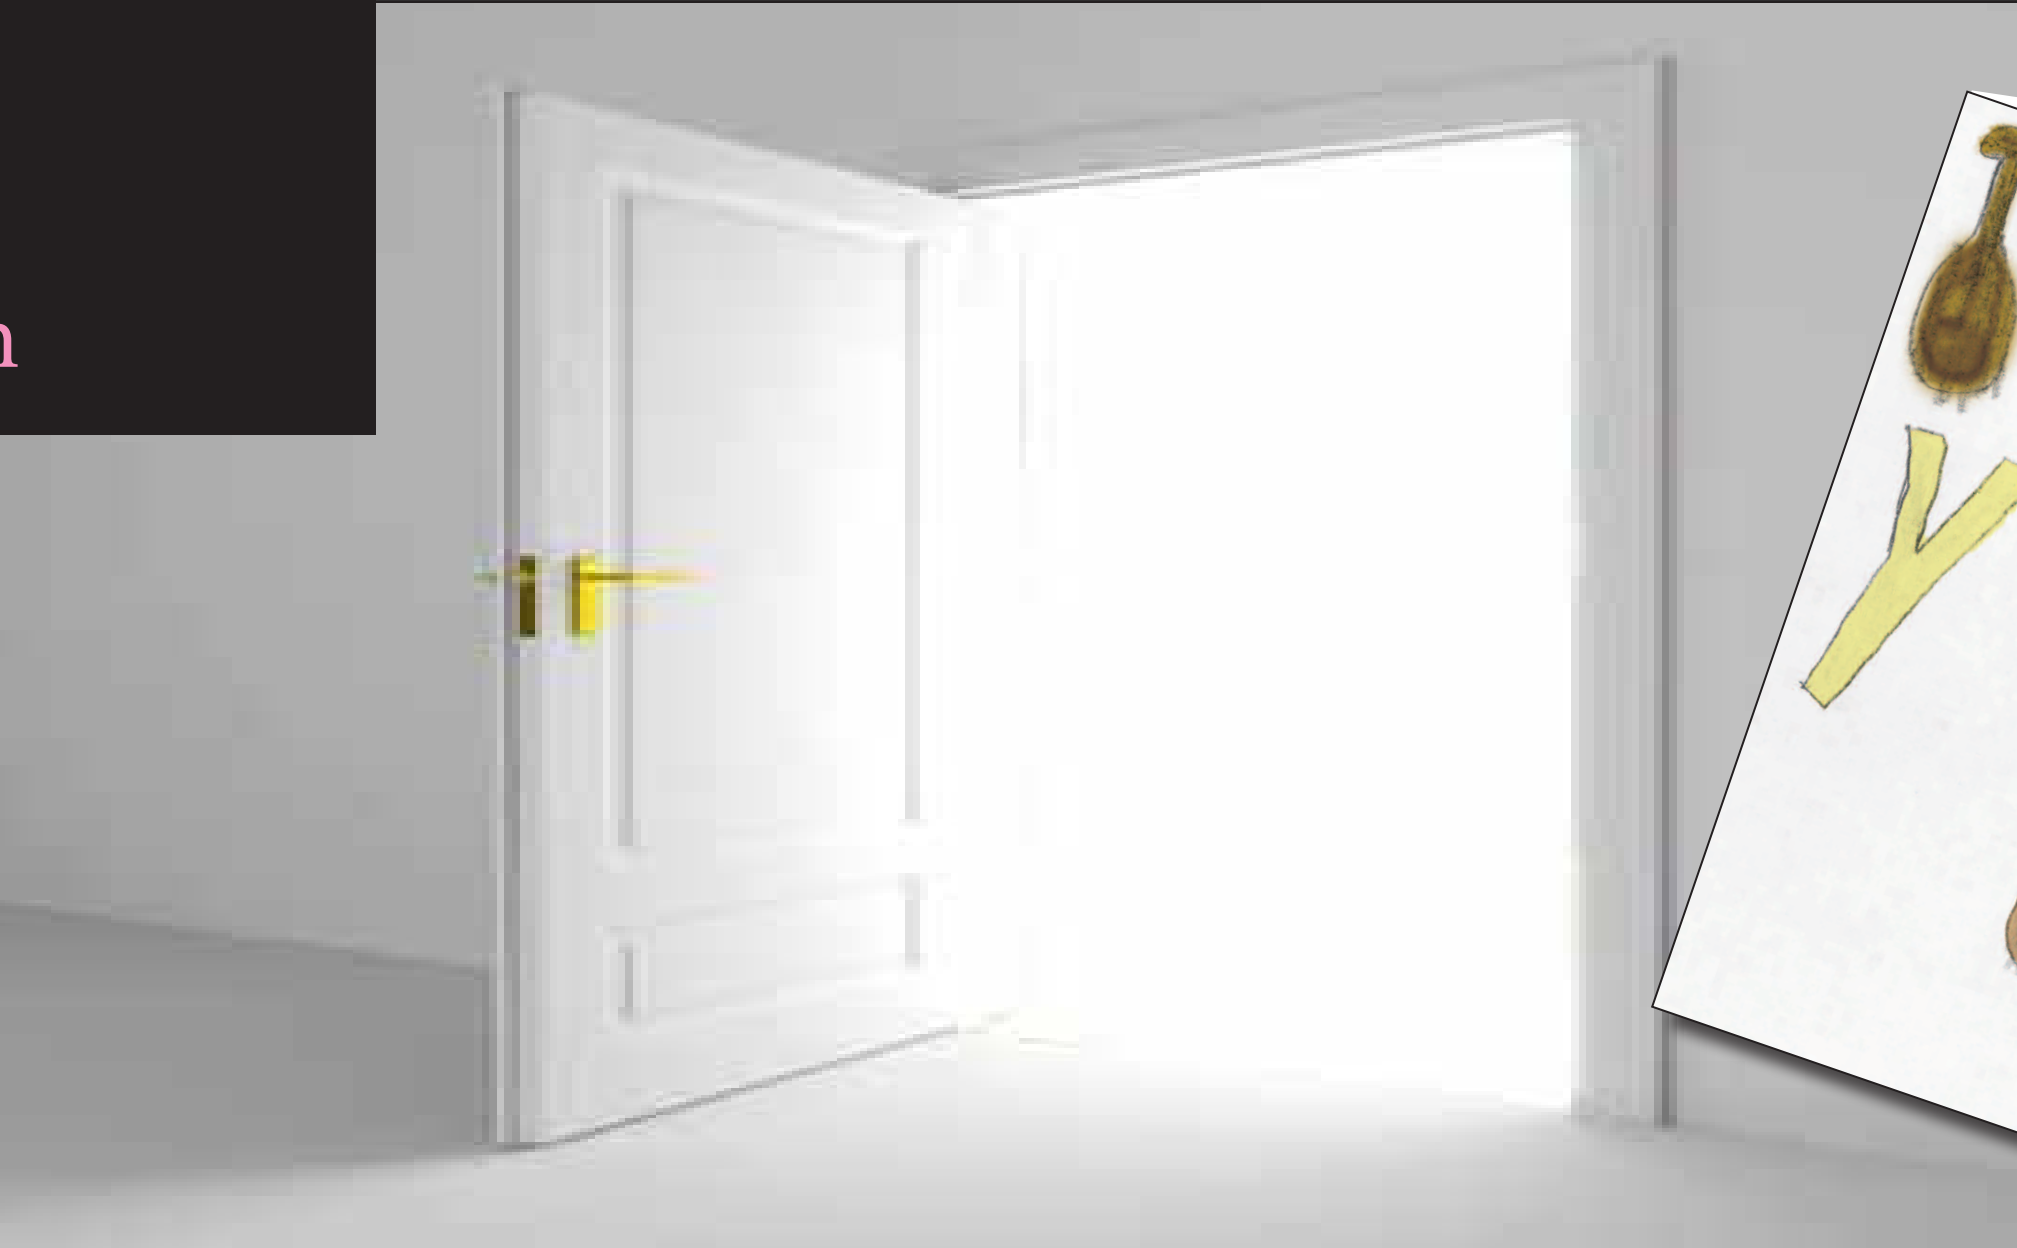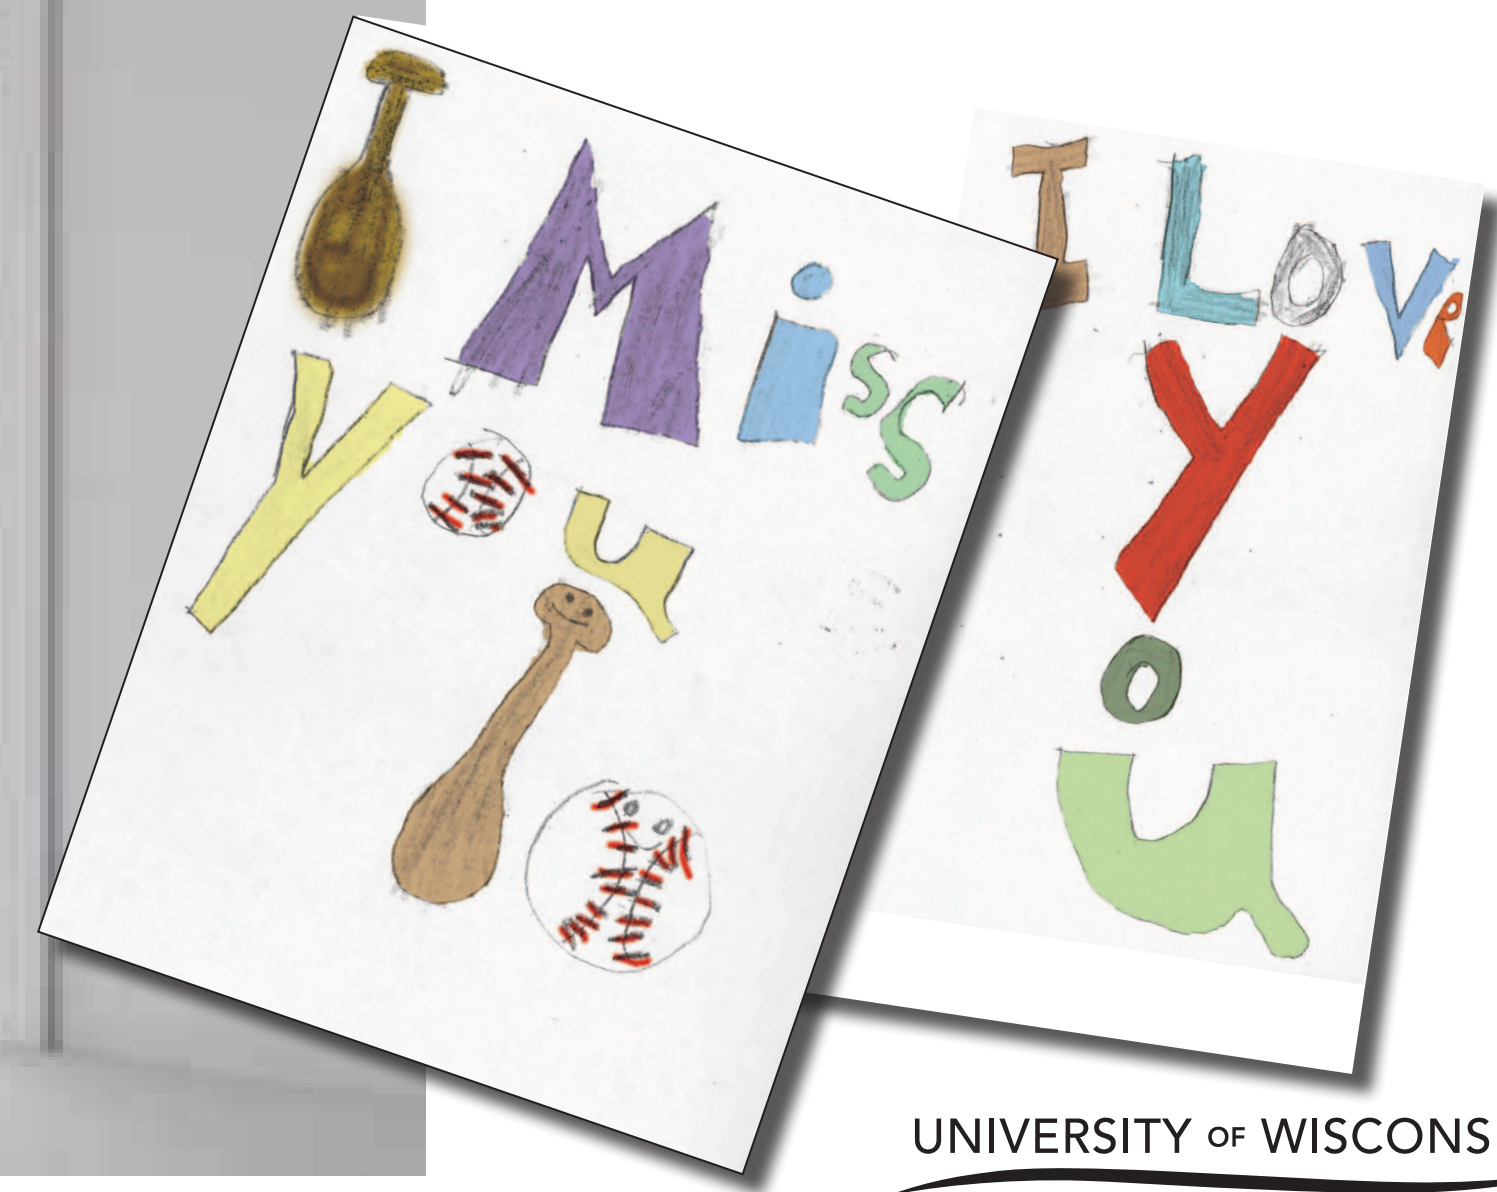

**GUILTY UNTIL PROVEN INNOCENT**

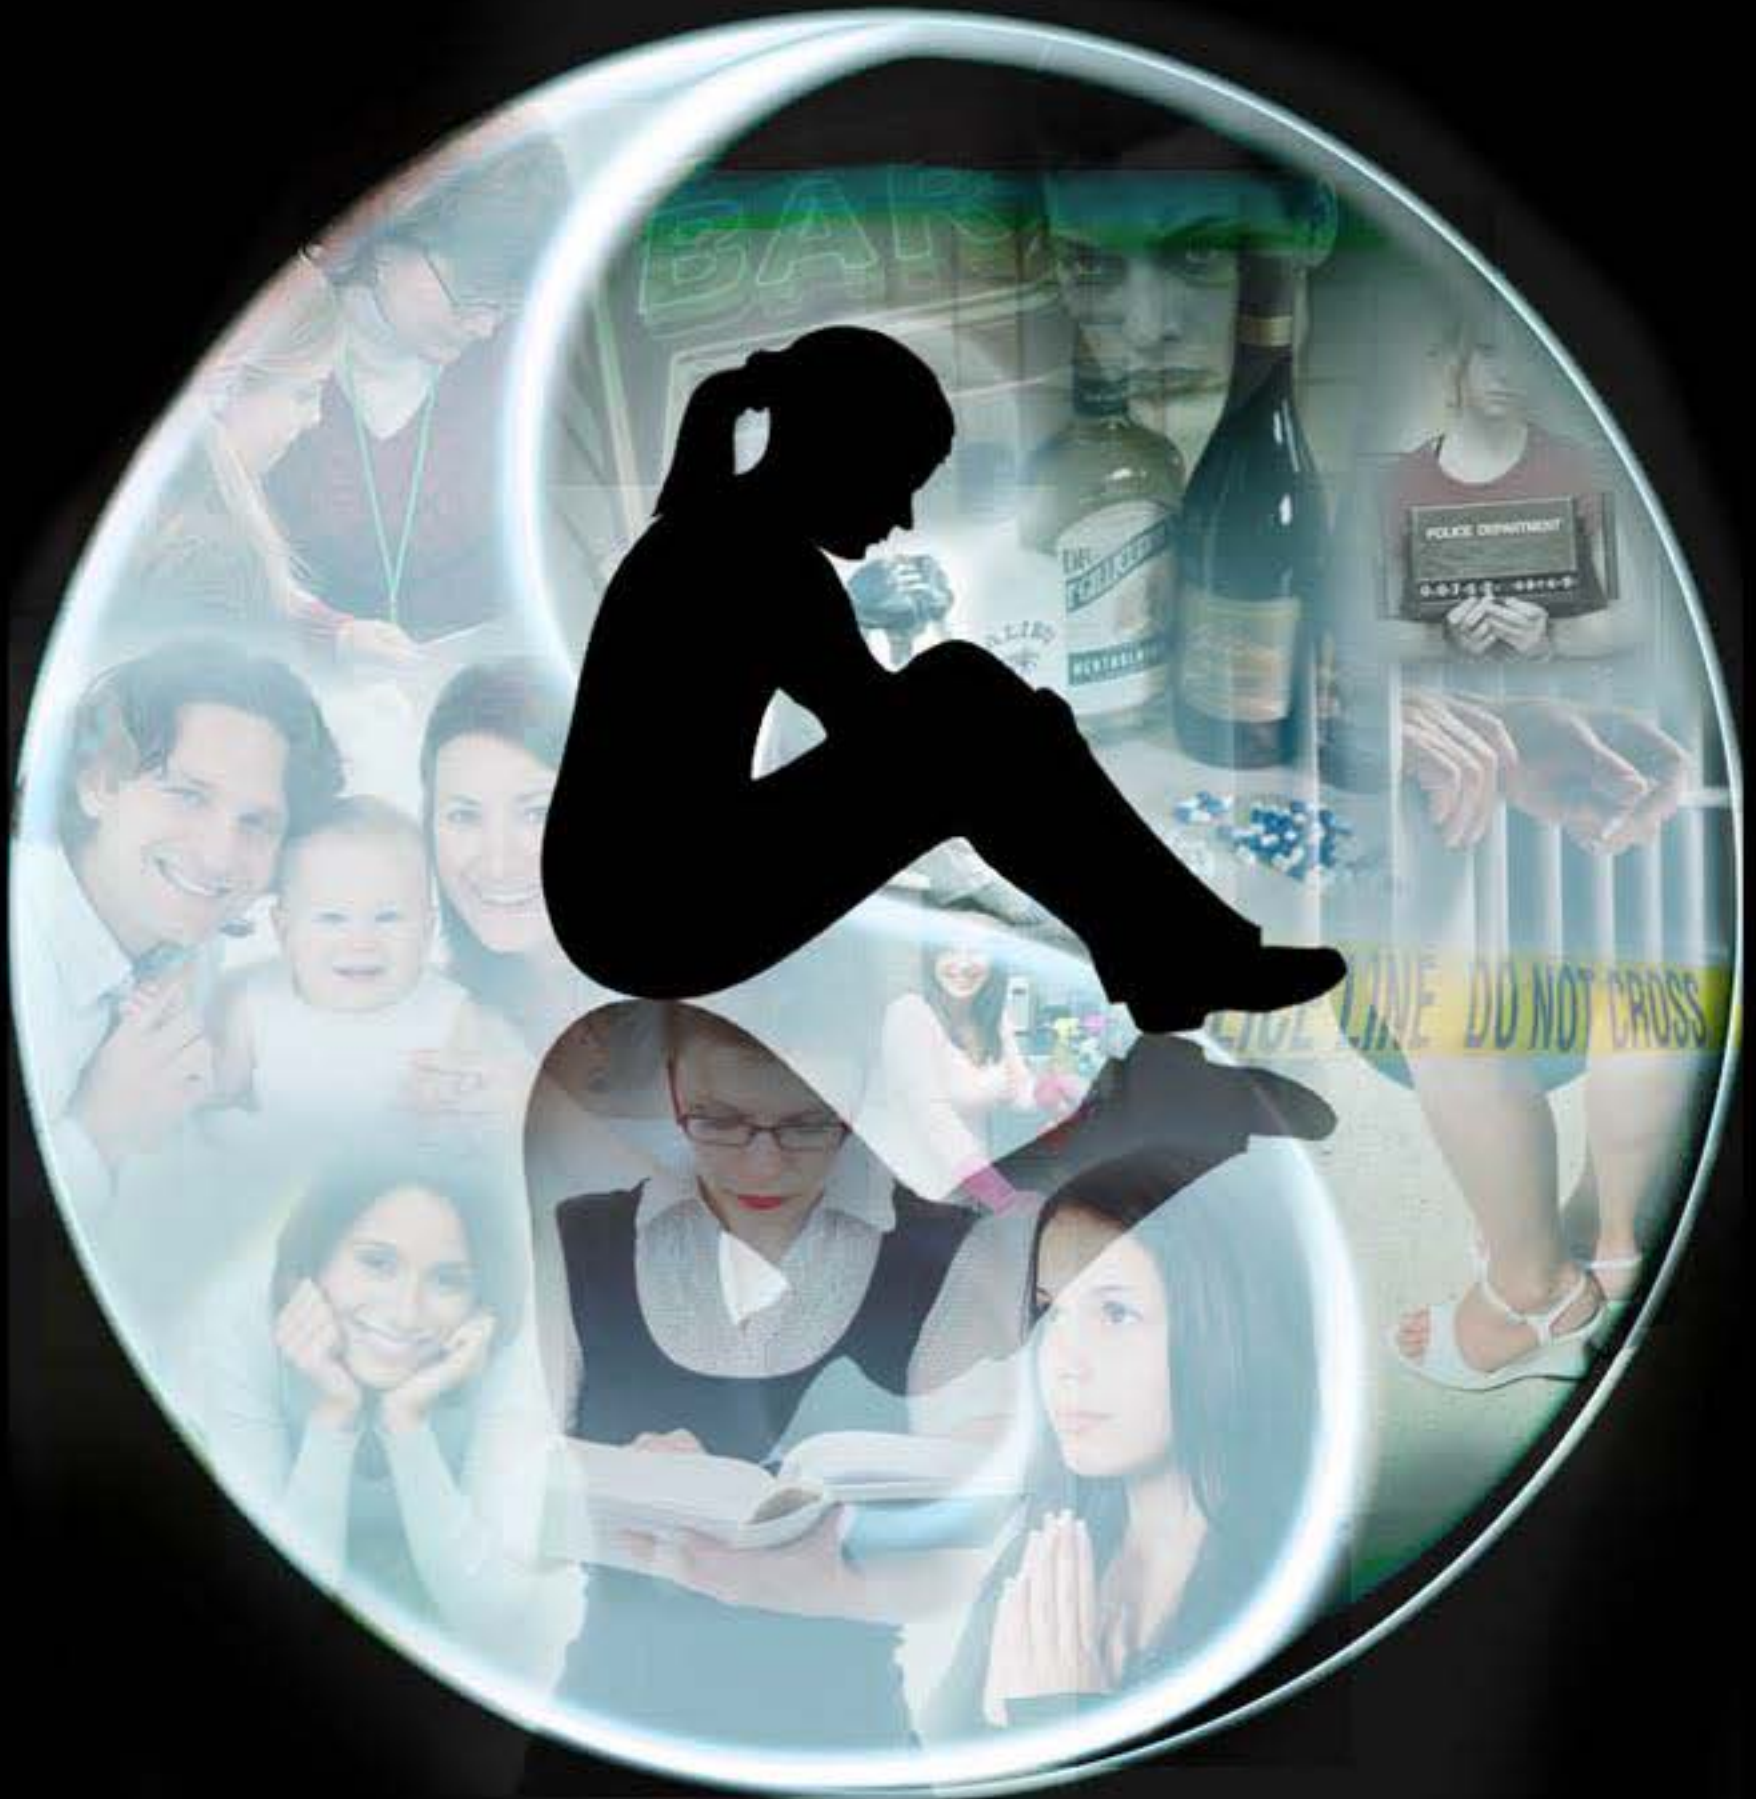

**TRUTHS**

**ONCE YOU CROSS THE INVISIBLE  
LINE YOU WILL ALWAYS BE JUDGED**

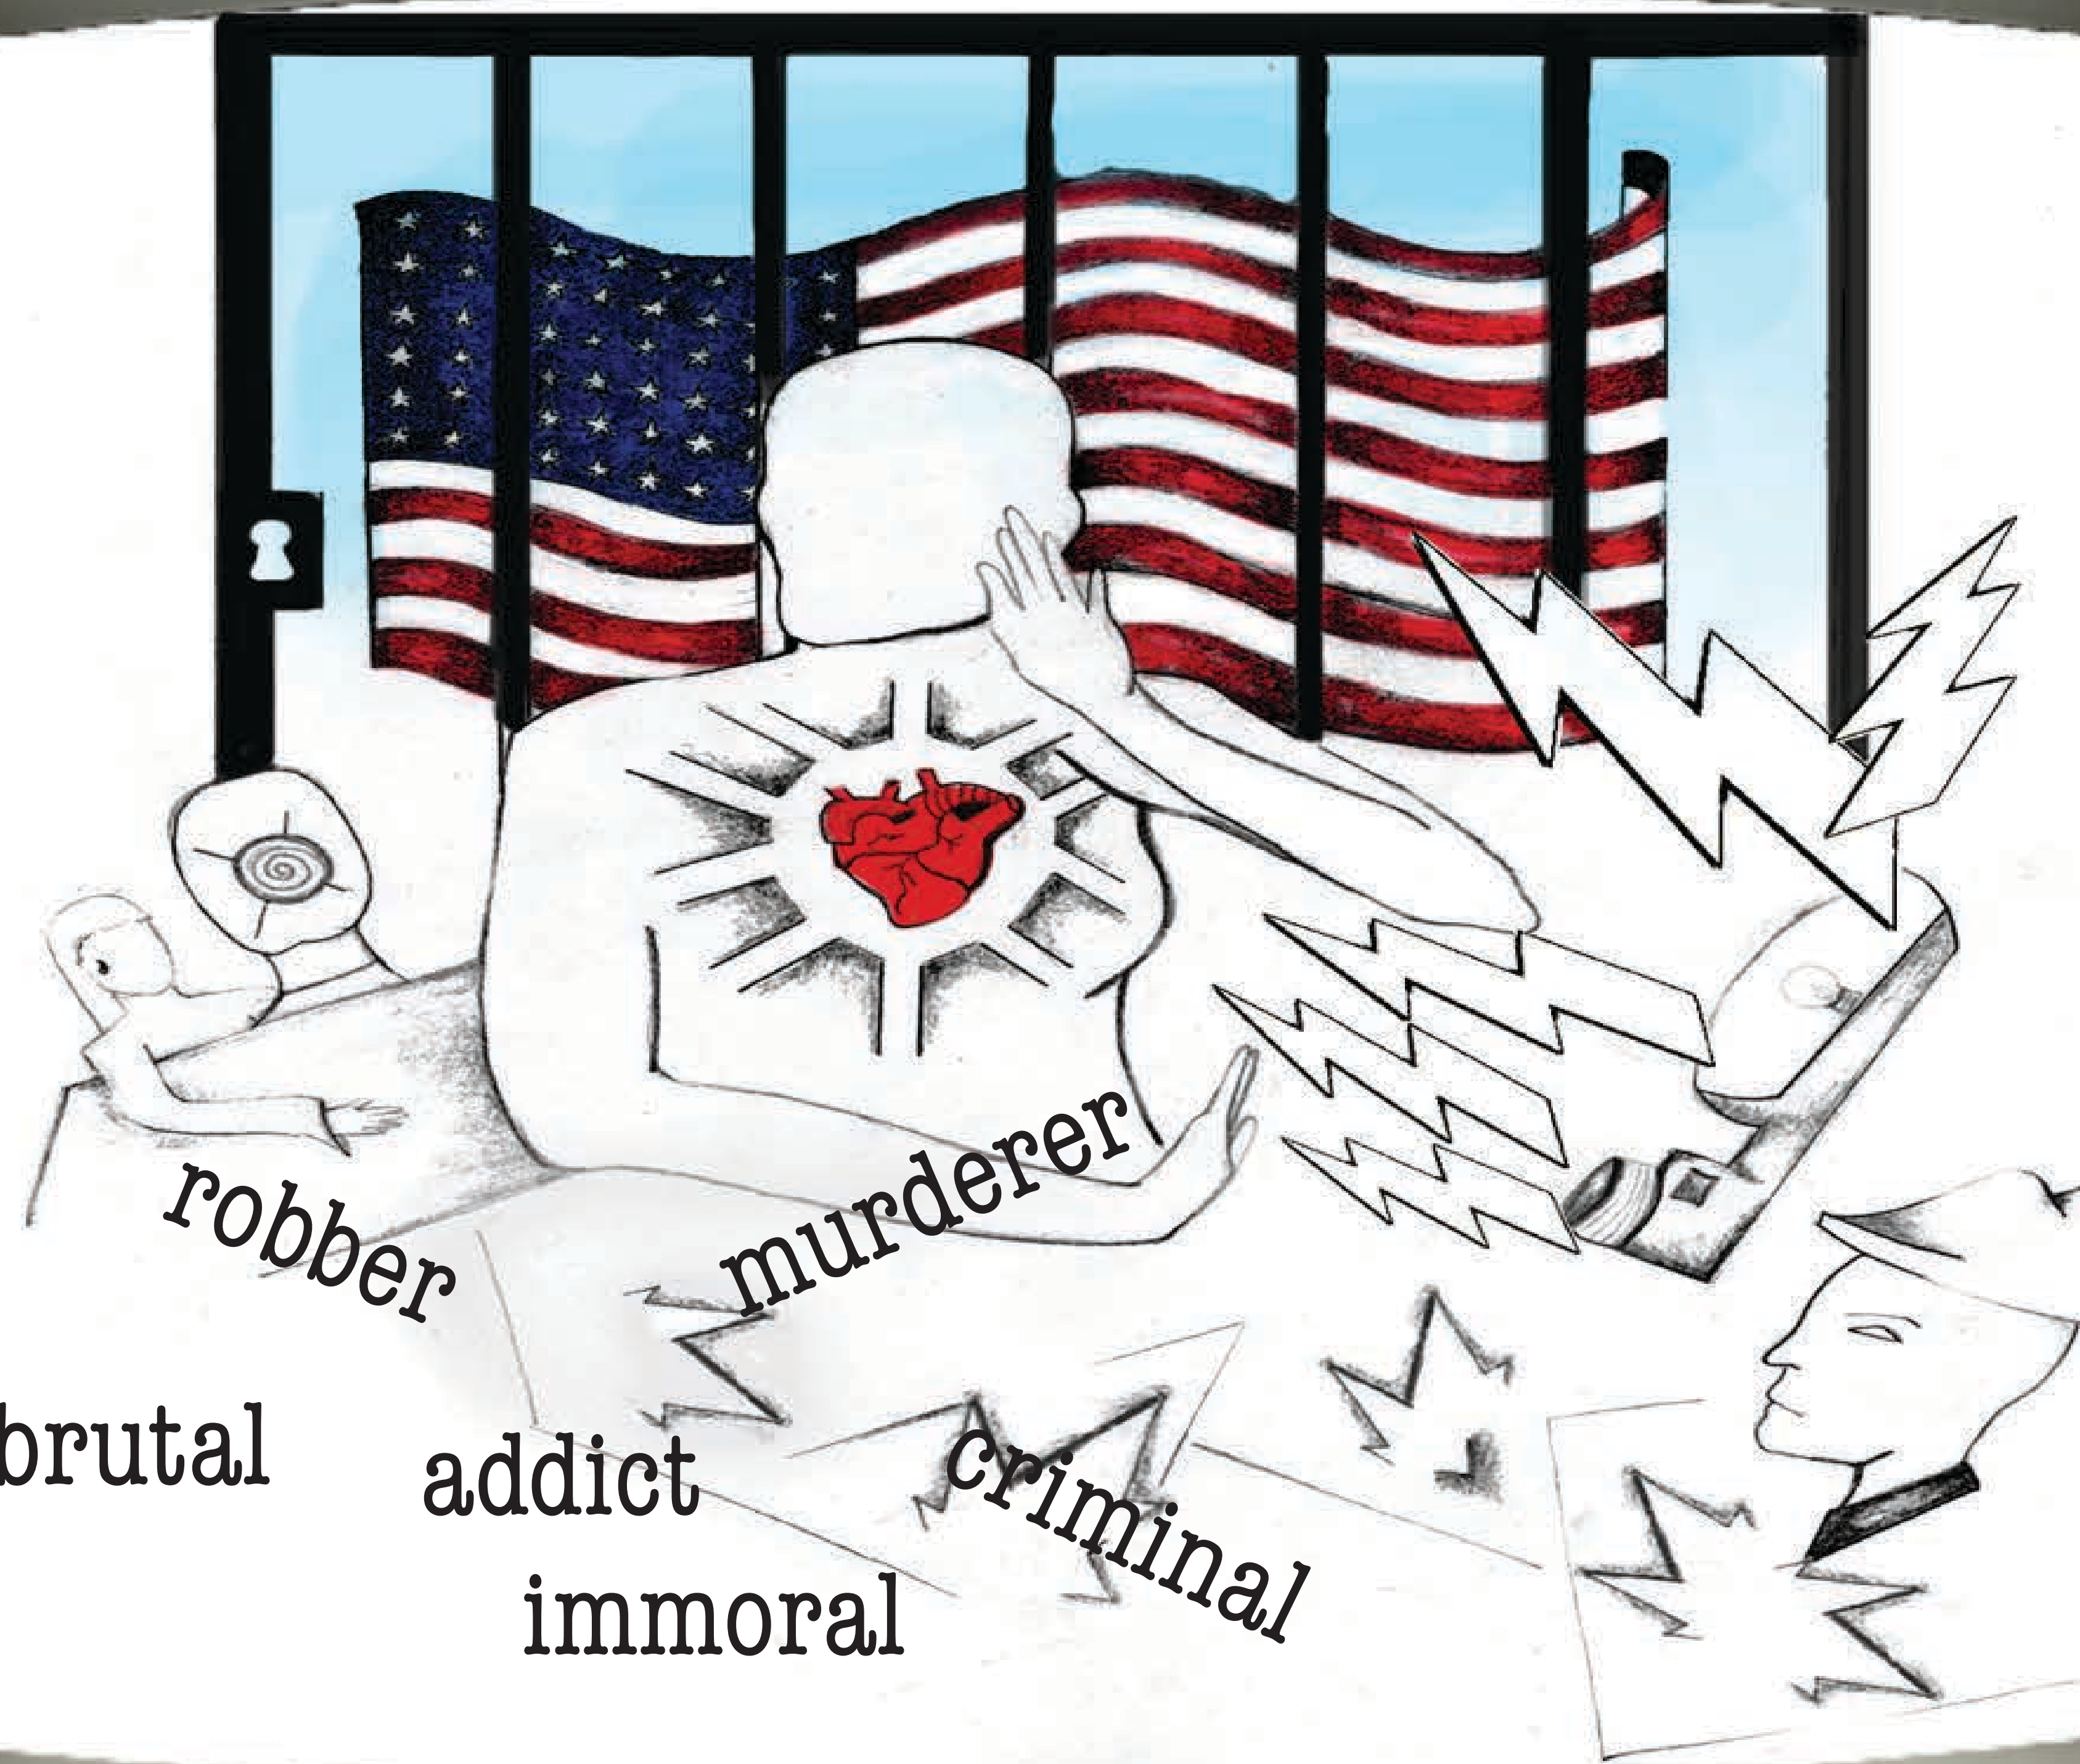

robber

murderer

brutal

addict

immoral

criminal

UNIVERSITY of WISCONSIN

OSHKOSH
